# Supplementary material for: Novel Approach for Glycemic Management Incorporating Vibration Stimulation of Skeletal Muscle in Obesity
Source: MDPI journal article supplement (doi:10.3390/ijerph20064708), 2023-03-07
Supplement: s1 [file s1]

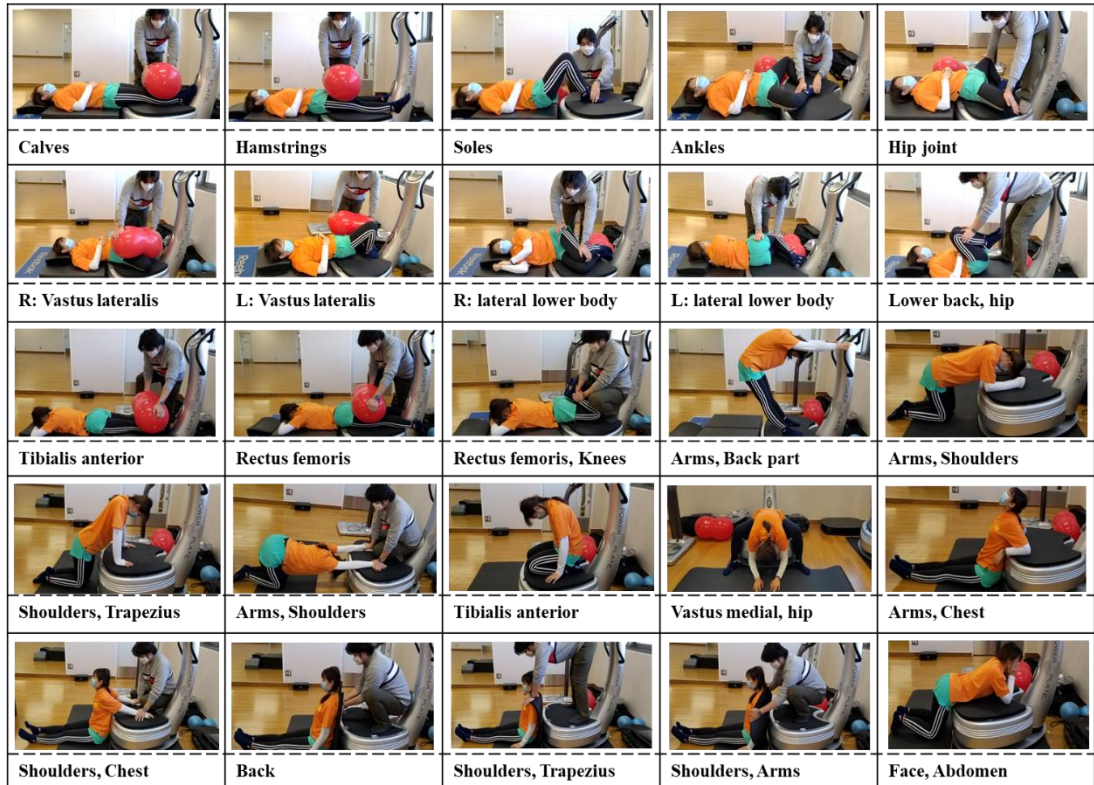

**Figure S1.** The target part of the body in the novel  $\kappa$ VT program (50 Hz, 4 mm, 25 postures with relaxation and stretching), R: Right, L: Left

**Table S1.** Comparison of the sleep time, walking, physical activity baseline and during the experiment period

| Parameter, unit         | Baseline             | During the experiment period | <i>p</i> |
|-------------------------|----------------------|------------------------------|----------|
| Total sleep time, min/d | 389.0 $\pm$ 64.6     | 374.8 $\pm$ 83.0             | 0.24     |
| Walking step, step/d    | 10036.2 $\pm$ 4463.4 | 10265.9 $\pm$ 3768.2         | 0.54     |
| Light PA, min/d         | 335.7 $\pm$ 101.3    | 347.6 $\pm$ 126.1            | 0.51     |
| Moderate PA, min/d      | 110.0 $\pm$ 71.4     | 129.3 $\pm$ 84.8             | 0.21     |
| Vigorous PA, min/d      | 14.0 $\pm$ 19.1      | 15.1 $\pm$ 26.1              | 0.78     |

**Note:** Wilcoxon signed-rank test, Mean  $\pm$  SD, PA: physical activity, d: day

**Table S2. Comparison of ISF Glucose Concentration in CT and ET within 2 hours of OGTT**

| Parameter, unit                               | Time of OGTT | CT          | ET          | Time effect, <i>P</i> | Trial effect, <i>P</i> | Interaction, <i>P</i> (Times × Trials) |
|-----------------------------------------------|--------------|-------------|-------------|-----------------------|------------------------|----------------------------------------|
| ISF Glucose Concentration for 2hours, (mg/dL) | Base line    |             |             |                       |                        |                                        |
|                                               | 0min         | 91.5 ± 7.3  | 90.7 ± 7.3  |                       |                        |                                        |
|                                               | 15min        | 101.9 ± 7.3 | 103.9 ± 7.3 |                       |                        |                                        |
|                                               | 30min        | 144.0 ± 7.3 | 147.1 ± 7.3 |                       |                        |                                        |
|                                               | 45min        | 178.2 ± 7.3 | 167.4 ± 7.3 |                       |                        |                                        |
|                                               | 1h           | 186.3 ± 7.3 | 171.6 ± 7.3 | < 0.01                | 0.02                   | 0.60                                   |
|                                               | 1h 15min     | 184.5 ± 7.3 | 176.5 ± 7.3 |                       |                        |                                        |
|                                               | 1h 30min     | 178.4 ± 7.3 | 170.9 ± 7.3 |                       |                        |                                        |
|                                               | 1h 45min     | 172.5 ± 7.3 | 168.4 ± 7.3 |                       |                        |                                        |
|                                               | 2h           | 166.6 ± 7.3 | 161.0 ± 7.3 |                       |                        |                                        |

**Note:** Liner Mixed Model, Mean ± SE, OGTT: oral glucose tolerance test, ISF: interstitial fluid, CT: controlled trial, ET: experimental trial
